# Supplementary material for: Identification of a SiCL1 gene controlling leaf curling and capsule indehiscence in sesame via cross-population association mapping and genomic variants screening
Source: BMC Plant Biol. 2018 Nov 22;18:296. doi: 10.1186/s12870-018-1503-2 (PMC6251216; doi:10.1186/s12870-018-1503-2)
Supplement: Supplementary file 5 — Table S5. Information of primer pairs of the candidate markers for curly leaf trait. (XLSX 10 kb) [file 12870_2018_1503_MOESM5_ESM.xlsx]

## Sheet: Sheet1
Additional file 5: Table S5. Information of primer pairs of the candidate markers for curly leaf trait
Primer name	Primer sequence (5'-3')	Tm (°C)	Amplicon	InDel variation sequence
			size (bp)	CL genotype	cl genotype
SiCLInDel1 F	CTACTCCGAAGTCAGTGTTGGA	57	199	CAGGTAGCTATGTATATGCA	TCTTTG
SiCLInDel1 R	TTGACTACAATTTTCCTATGTTTTC	57	185
