# Supplementary material for: Identification of a SiCL1 gene controlling leaf curling and capsule indehiscence in sesame via cross-population association mapping and genomic variants screening
Source: BMC Plant Biol. 2018 Nov 22;18:296. doi: 10.1186/s12870-018-1503-2 (PMC6251216; doi:10.1186/s12870-018-1503-2)
Supplement: Supplementary file 7 — Table S6. Information of primer pairs of the cDNA sequences of SiCL1 alleles in sesame. Genome information of the six candidate variants for the curly leaf trait. Note: The italic letters in the sequences are the 5′ and 3′ UTR regions of SiCL1 alleles. (XLSX 13 kb) [file 12870_2018_1503_MOESM7_ESM.xlsx]

## Sheet: Sheet1
Additional file 7: Table S6. Information of primer pairs of the cDNA sequences of SiCL1 alleles in sesame
Primer name	Primer sequence (5'-3')	Tm (°C)	Amplicon (bp)	cDNA sequence (5'-3')
SiCL1 F	TCCAACTTTTGCTGTCCGTC	58.4	1749	SiCL1-1: TCCAACTTTTGCTGTCCGTCCGTGTGCTTTTGTTTTTGCACCCATATTTTATTTCACTTTTTCAGACCATATCTTTAGATTATAAAATTTGCAAGAGAAACACACACACACACACACACACACCCCCTCGACACTCACATATTTGGTTTCATTACAAGAAAATCTGAGGTTGCTAGAAAAGAAGAGAGGAGGAAAAAATGCCCTTAGAAGGGATTTTCTTAGAGCCCTCTTCAAAGCCAGTTCCTGATCTTTCTCTCCACATTAGTCTACCCAACTGCGATTCATCCTCGTCATCAAGAAGCAGCAACACCAAAAACGACGCCGTTTCCAGCTTCGATCTCCCGGTGAACATCAGCAGCAAGCCCAAGGGCTGCACTTCCTTCACCGATC…
SiCL1 R	GGAATCCAAAATCCAAGTGAGA	58.4	1746
Sicl1 F	TCCAACTTTTGCTGTCCGTC	58.4	1672	Sicl1-1: TCCAACTTTTGCTGTCCGTCCGTGTGCTTTTGTTTTTGCACCCATATTTTATTTCACTTTTTCAGACCATATCTTTAGATTATAAAATTTGCAAGAGAAACACACACACACACACACACACACCCCCTCGACACTCACATATTTGGTTTCATTACAAGAAAATCTGAGGTTGCTAGAAAAGAAGAGAGGAGGAAAAAATGCCCTTAGAAGGGATTTTCTTAGAGCCCTCTTCAAAGCCAGTTCCTGATCTTTCTCTCCACATTAGTCTACCCAACTGCGATTCATCCTCGTCATCAAGAAGCAGCAACACCAAAAACGACGCCGTTTCCAGCTTCGATCTCCCGGTGAACATCAGCAGCAAGCCCAAGGGCTGCACTTCCTTCACCGATC…
Sicl1 R	GGAATCCAAAATCCAAGTGAGA	58.4	1669
Note: The italic letters in the sequences are the 5' and 3' UTR regions of SiCL1 alleles.
